# Supplementary material for: Near-infrared emission, energy transfer, and mechanisms of Mn2+ and Cr3+ Co-doped lead-free Cs2AgInCl6 double perovskites
Source: Royal Society of Chemistry journal article supplement (doi:10.1039/d3tc02410e), 2023-01-01
Supplement: d3tc02410e1.pdf [file d3tc02410e1.pdf]

## Supporting Information

### Near-infrared Emission, Energy Transfer, and Mechanisms of Mn<sup>2+</sup> and Cr<sup>3+</sup>

### Co-doped Lead-free Cs<sub>2</sub>AgInCl<sub>6</sub> Double Perovskites

*Daiwen Chen<sup>a</sup>, Huayuan Li<sup>a</sup>, Cu Wu<sup>a</sup>, Liya Zhou<sup>a</sup>, Peican Chen<sup>a</sup>, Qi Pang<sup>a\*</sup>, Xinguo Zhang<sup>b</sup> and Jin Zhong Zhang<sup>c</sup>*

*<sup>a</sup> Guangxi Key Laboratory of Petrochemical Resource Processing and Process*

*Intensification Technology, School of Chemistry and Chemical Engineering, Guangxi*

*University, Nanning 530004, Guangxi, Peoples R China*

*<sup>b</sup> School of Pharmaceutical Sciences, Southern Medical University, Guangzhou*

*510515, Peoples R China*

*<sup>c</sup> Department of Chemistry and Biochemistry, University of California, Santa Cruz,*

*California 95064, United States*

*Corresponding authors: [pqigx@163.com](mailto:pqigx@163.com)*

## Experimental

### 1. Chemicals

CsCl (99%, Aladdin), InCl<sub>3</sub> (99.99%, Aladdin), AgCl (99.5, Macklin), CrCl<sub>3</sub>·6H<sub>2</sub>O (analytical pure, Aladdin), MnCl<sub>2</sub> (99.99%, Aladdin), hydrochloric acid (HCl, analytical pure, Chengdu Kelong Chemical Reagent Factory, China) were all purchased and used as received without further purification.

### 2. Synthesis of CAIC: xMn<sup>2+</sup> DPSCs (x=0.0100, 0.0300, 0.0500, 0.0700, 0.0900 and 0.110 mmol)

Mn<sup>2+</sup> doped Cs<sub>2</sub>AgInCl<sub>6</sub> DPSCs were prepared following a hydrothermal method. Solid CsCl (0.337 g, 2.00 mmol), InCl<sub>3</sub> (0.221 g, 1.00 mmol), AgCl (0.1433 g, 1.00 mmol) and MnCl<sub>2</sub> (x=0.0100, 0.0300, 0.0500, 0.0700, 0.0900, 0.1100mmol) were mixed with 15.0 ml (10.0 M) HCl in a 50 cm<sup>3</sup> Teflon autoclave. Varied Mn<sup>2+</sup> doping concentrations are achieved by changing the Mn<sup>2+</sup> amounts during the synthesis. The solution was heated at 150 °C for 12 h, then slowly and steadily cooled to 60 °C at a speed of 3 °C per hour in a Teflon-lined stainless steel autoclave and maintained at a constant temperature of 60 °C. The as-prepared crystals were filtered out and washed with isopropanol and dried in a furnace at 60°C for 3 hours. The corresponding samples are noted as CAIC: xMn<sup>2+</sup> DPSCs (x=0.0100, 0.0300, 0.0500, 0.0700, 0.0900 and 0.1100)

### **3. Synthesis of CAIC: 0.09Mn<sup>2+</sup>, yCr<sup>3+</sup> (y=0.0100, 0.0500, 0.100, 0.200, 0.300 and 0.400 mmol)**

The synthesis method used is similar to the CAIC: xMn<sup>2+</sup> DPSCs except for additionally adding different amount of CrCl<sub>3</sub>·6H<sub>2</sub>O with 0.0100, 0.0500, 0.100, 0.200, 0.300 and 0.400 mmol. The corresponding samples are noted as CAIC: 0.09Mn<sup>2+</sup>, yCr<sup>3+</sup> (y=0.0100, 0.0500, 0.100, 0.200, 0.300 and 0.400 mmol).

### **4. Characterization**

The powders used were all obtained by grinding in a mortar. SMARTLAB3KW powder diffractometer measured the X-ray diffraction (XRD) patterns with the Cu K $\alpha$  radiation source at a voltage of 40 kV and 30 mA. The morphology and size of the DPSCs were characterized by Scanning Electron Microscope (SEM). The elemental

composition and distribution of the materials were observed by energy-dispersive X-ray spectroscopy (EDS) coupled with SEM. Inductively coupled plasma optical emission spectroscopy (ICP-OES) was performed on an Agilent 720ES instrument. X-ray photoelectron spectroscopy (XPS) was measured with Thermo Fisher Scientific Company in the United States of Escalab250Xi X-ray photoelectron spectrometer. Electron paramagnetic resonance (EPR) spectra were measured by a Bruker-A300-10/12 spectrometer. Measurements were done at room temperature with a 9.86 GHz microwave frequency, 4 G modulation amplitude and a power of 2 mW. UV-vis diffuse reflectance spectra were measured using the Techcomp UV2600 UV-vis spectrophotometer. PL, PLE, TRPL, and Temperature-dependent PL were measured by FLS1000 fluorescence spectrometer of Edinburgh instruments utilizing the xenon lamp (Xe900) for excitation. (The detectors used for measuring the PL include a visible range signal detector with spectral coverage from 230 nm to 800 nm and a NIR signal detector with spectral coverage from 800 nm to 1700 nm) PLQY was measured by integrating sphere and Hamamatsu quantum yield measurement system.

## **5. Screen printing**

We mixed the CAIC: Mn<sup>2+</sup>, Cr<sup>3+</sup> DPSCs powder with terpinol. Pouring the mixed slurry onto one end of the printed template with the patterns, and the blade was used to apply appropriate pressure to the ink slurry on the printing screen plate, while moving evenly toward the other end. The expected uniform patterns form during the movement. Then, the substrate was heated to 60 °C to remove the solvent.

## **6. Calculation of bandgap**

The optical bandgap of the phosphor can be calculated using the Kubelka–Munk model to convert the absorption spectrum of the phosphor into function<sup>1</sup>.

$$F(R) = \frac{(1 - R)^2}{2R} \quad (1)$$

$$\alpha h\nu = c(h\nu - E_g)^{\frac{1}{2}} \quad (2)$$

$$[(h\nu F(R_\infty))]^2 = A(h\nu - E_g) \quad (3)$$

where R is the diffuse reflection of the spectrum,  $\alpha$  is the linear absorption coefficient,  $h\nu$  is the energy of light, c is a constant, A is a constant,  $E_g$  is the direct bandgap, and  $R_\infty$  represents the reflectance of the infinitely thick sample with respect to a reference at each wavelength. On making a tangent at the inflection point of the curve, the  $h\nu$  value at the intersection of the tangent and the horizontal axis is the bandgap ( $E_g$ ) value.

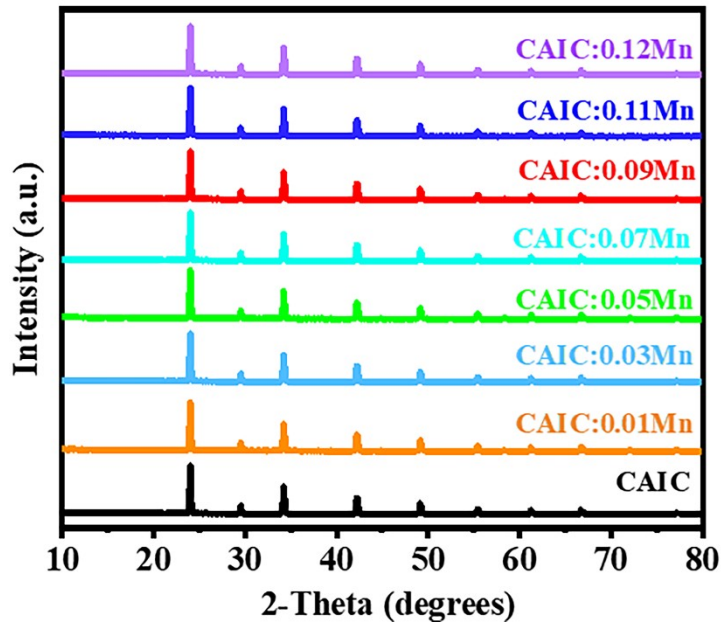

Figure S1. XRD patterns of  $Mn^{2+}$  doped CAIC DPSCs.

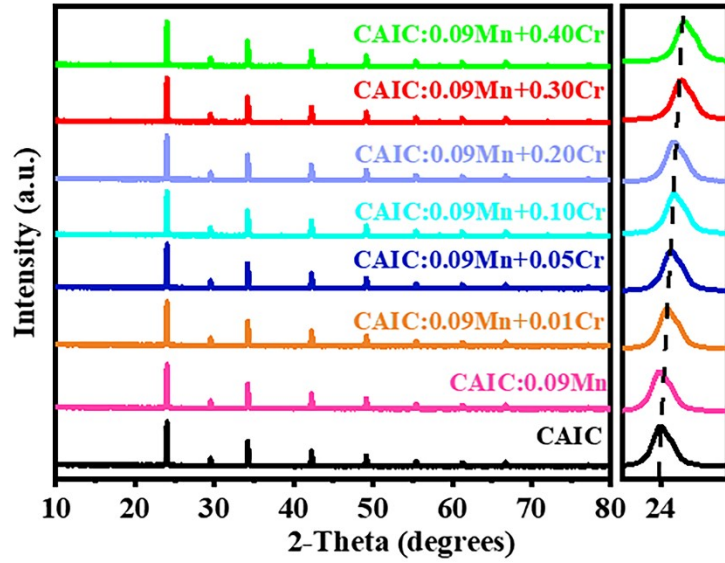

Figure S2. XRD patterns of CAIC:  $0.05\text{Mn}^{2+}$ ,  $y\text{Cr}^{3+}$  ( $x = 0-0.40$ ) DPSCs and (220) local enlarged view of crystal plane.

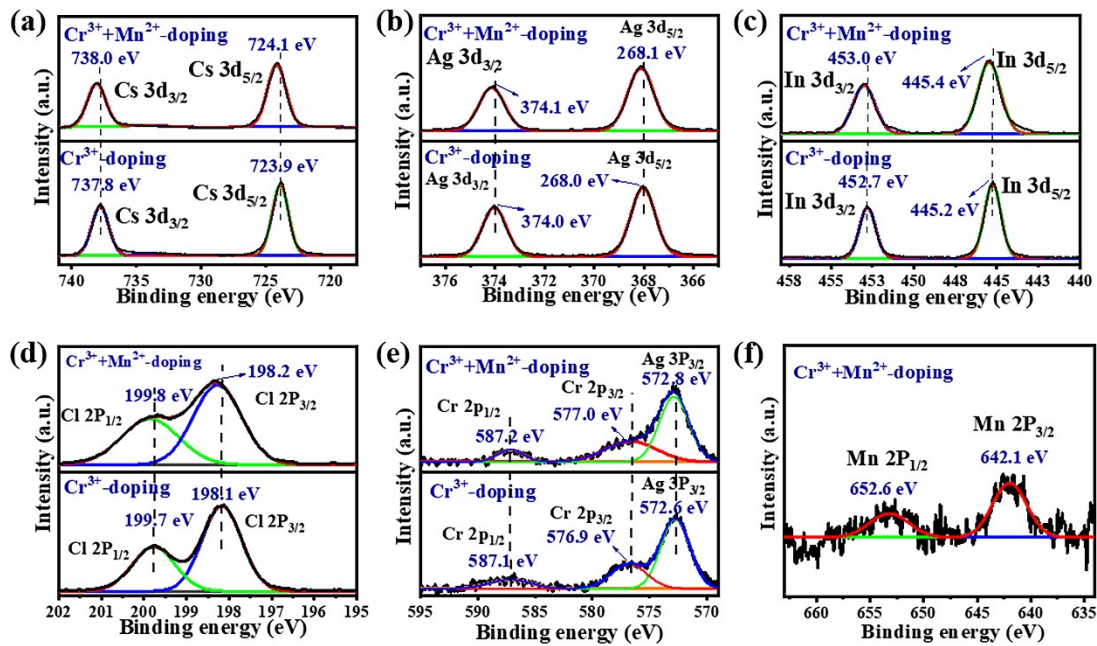

Figure S3. X-ray photoelectron spectroscopy (XPS) core level spectra of (a) Cs 3d, (b) Ag 3d, (c) In 3d, (d) Cl 2p, (e) Cr 2p, (f) Mn 2p.

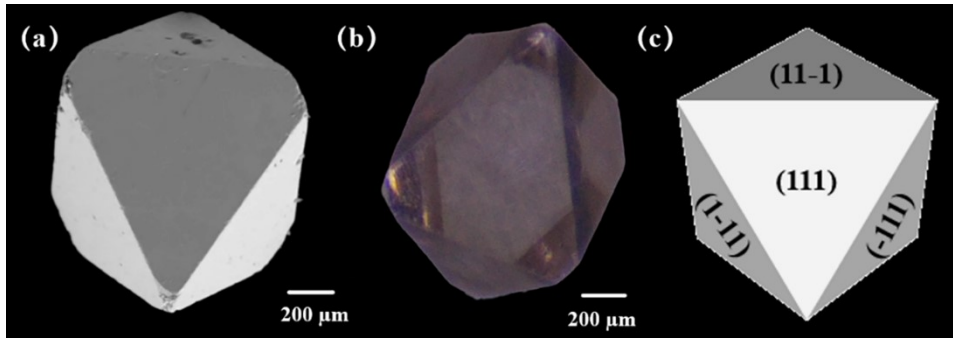

Figure S4. (a) The SEM images of CAIC:  $\text{Mn}^{2+}$ ,  $\text{Cr}^{3+}$  DPSCs. (b) photographs of DPSCs obtained via an optical microscope (c) and the simulated crystal faces for one crystal particle.

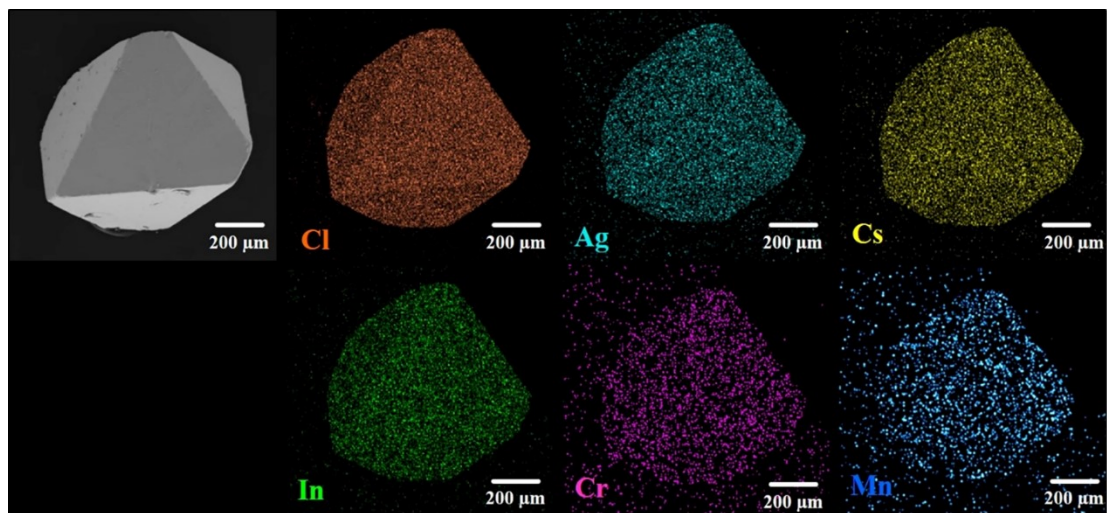

Figure S5. SEM image and EDS spectra of CAIC:  $\text{Mn}^{2+}$ ,  $\text{Cr}^{3+}$  DPSCs with the corresponding atomic maps.

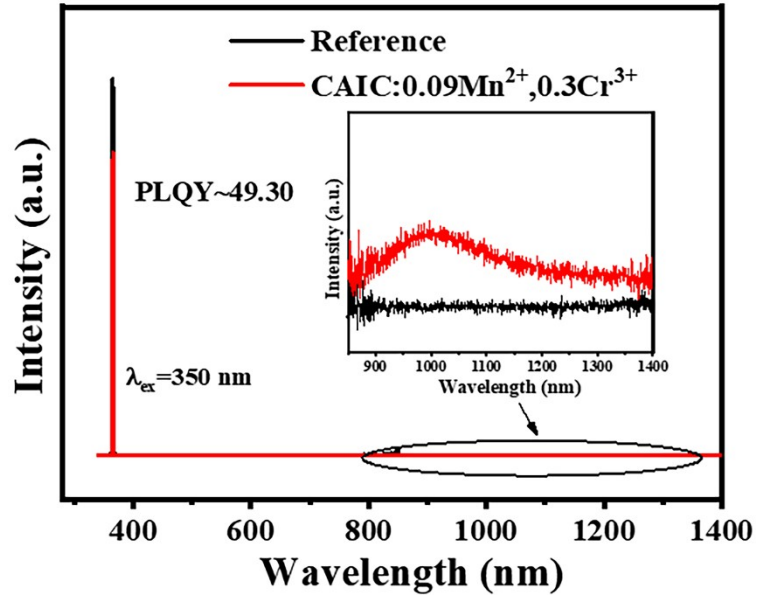

Figure S6. Luminescent spectra for the PLQY measurement of CAIC: 0.09Mn<sup>2+</sup>, 0.3Cr<sup>3+</sup>.

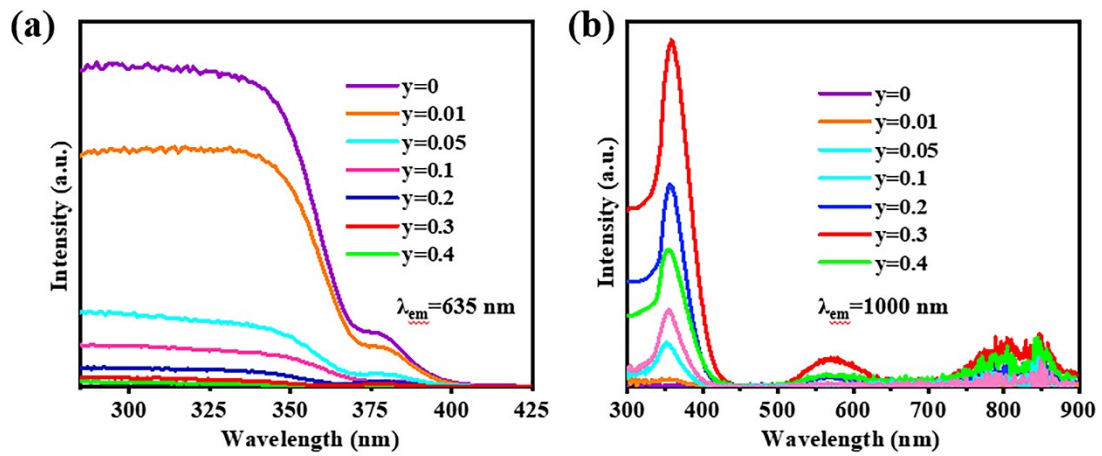

Figure S7. (a and b) PLE spectra of CAIC: 0.09Mn<sup>2+</sup>, yCr<sup>3+</sup> with emission at (a) 635 nm and (b) 1000 nm.

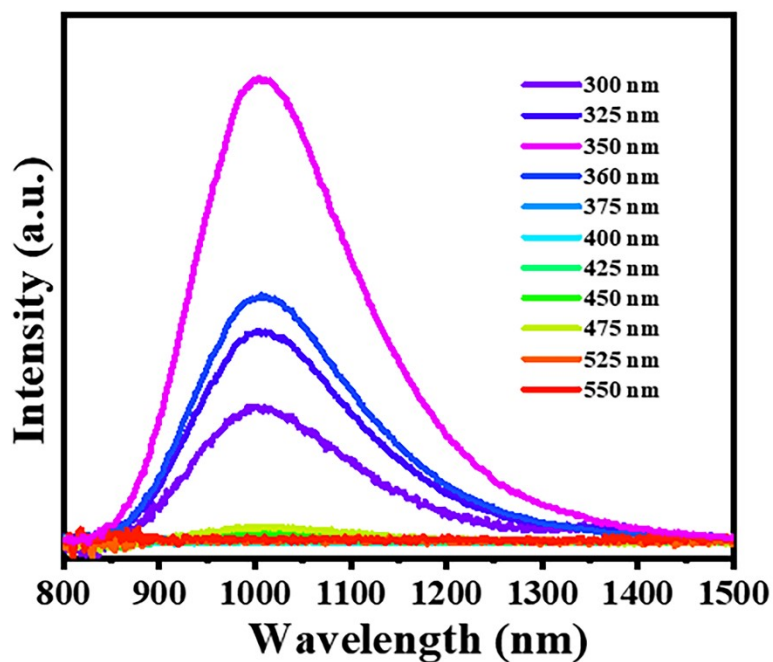

Figure S8. Excitation-wavelength-dependent (300-550 nm) PL spectra of CAIC: 0.09  $\text{Mn}^{2+}$ , 0.30 $\text{Cr}^{3+}$ .

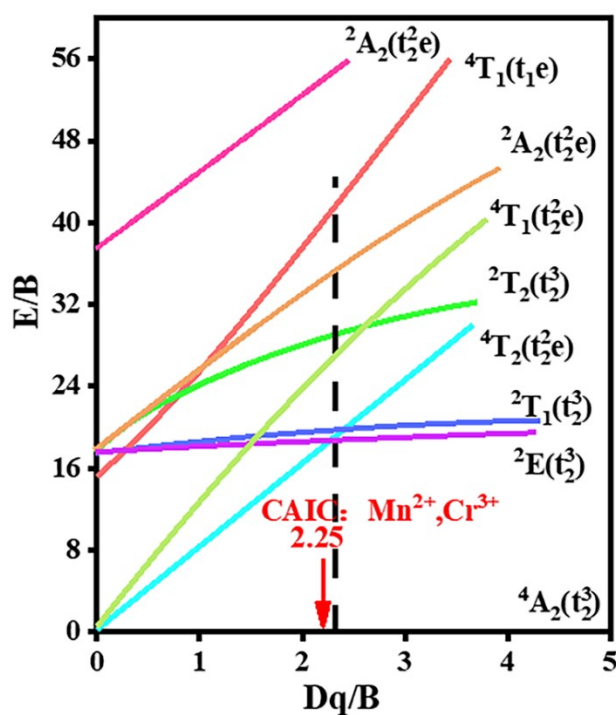

Figure S9. Tanabe-Sugano energy level diagram of  $\text{Cr}^{3+}$  in an octahedral crystal field.

According to energy level splitting, the weak crystal field and the strong crystal field are defined by the intersection of  ${}^4\text{T}_2$  and  ${}^2\text{E}$  energy levels<sup>2</sup>. The following



equations can be used to obtain  $D_q/B$ :

$$D_q = E(^4A_2 \rightarrow ^4T_2) / 10 \quad (4)$$

$$\frac{D_q}{B} = \frac{15 \left( \frac{\Delta E}{D_q} - 8 \right)}{(\Delta E / D_q)^2 - 10 (\Delta E / D_q)} \quad (5)$$

In the above equations,  $D_q$  and  $B$  are the crystal field splitting energy and Racah parameter, respectively, and  $\Delta E$  is the energy difference between  $E(^4A_2 \rightarrow ^4T_1)$  and  $E(^4A_2 \rightarrow ^4T_2)$  transitions, obtained by the peak of the absorption band. Based on eqn (4) and (5), the calculated values of  $D_q$  and  $B$  are about  $\sim 1204$  and  $533 \text{ cm}^{-1}$  respectively. The results in a  $D_q/B$  value of 2.25 (Figure S9), which is less than 2.30, and thus  $\text{Cr}^{3+}$  will generate broadband NIR emission in this host.

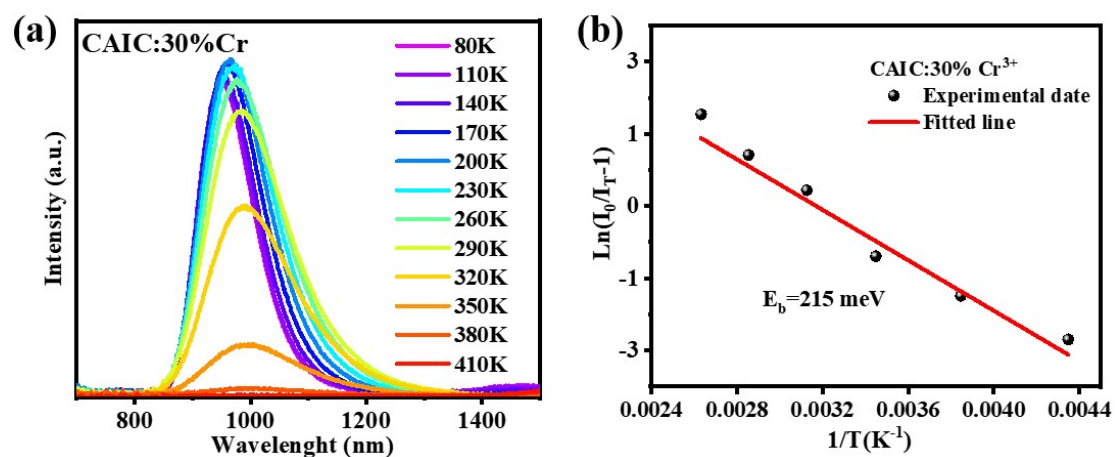

Figure S10. (a) Temperature-dependent PL spectra of CAIC: 0.30 $\text{Cr}^{3+}$  DPSCs under 350 nm excitation. (b)  $\text{Ln}(I_0/I_T-1)$  versus  $1/T$  plot of the temperature dependent spectra.

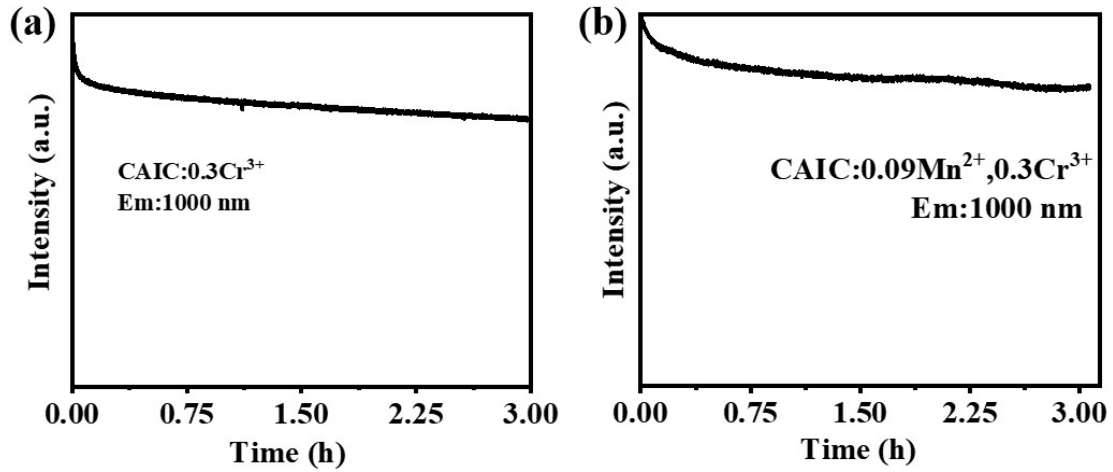

Figure S11. The PL intensity of CAIC:0.3Cr<sup>3+</sup> and CAIC: 0.09Mn<sup>2+</sup>, 0.3Cr<sup>3+</sup> exposed at 350 nm UV light for 3h. It shows the PL intensity dependence of irradiation time.

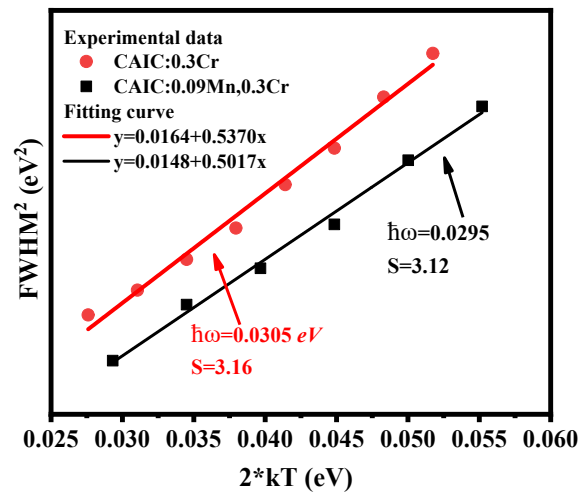

Figure S12. The fitting results of FWHM<sup>2</sup> as a function of 2kT.

Table S1 Mn<sup>2+</sup> and Cr<sup>3+</sup> content from starting materials and measured by ICP.CAIC: 0.09Mn<sup>2+</sup>, yCr<sup>3+</sup>

| Cr <sup>3+</sup>         |                          | Mn <sup>2+</sup>         |                          |
|--------------------------|--------------------------|--------------------------|--------------------------|
| Nominal (atomic ratio %) | ICP-OES (atomic ratio %) | Nominal (atomic ratio %) | ICP-OES (atomic ratio %) |
| 0                        | 0                        | 9                        | 0.0270                   |
| 1                        | 0.0030                   | 9                        | 0.0202                   |
| 5                        | 0.0063                   | 9                        | 0.0200                   |
| 10                       | 0.0151                   | 9                        | 0.0201                   |
| 20                       | 0.0325                   | 9                        | 0.0201                   |
| 30                       | 0.0417                   | 9                        | 0.0202                   |

Table S2 The detailed analysis of decay curves for CAIC: 0.09Mn<sup>2+</sup>, yCr<sup>3+</sup>.CAIC: 0.09Mn<sup>2+</sup>, yCr<sup>3+</sup>, monitored at 635nm

| Sample | A <sub>1</sub> | A <sub>2</sub> | $\tau_1$ | $\tau_2$ | $\tau_{ave}$ |
|--------|----------------|----------------|----------|----------|--------------|
| 0.09Mn | 15465.25       | 3773.54        | 114.23   | 578.58   | 370.8986     |
| 0.01Cr | 41148.89       | 2778.12        | 72.74    | 326.13   | 131.6184     |
| 0.05Cr | 91348.75       | 2115.46        | 63.6     | 351.4    | 96.24728     |
| 0.1Cr  | 146825.7       | 1575.37        | 41.79    | 359.88   | 68.6951      |
| 0.2Cr  | 274442.4       | 1373.26        | 43.5     | 394.87   | 58.7665      |
| 0.3Cr  | 272260.64      | 981.295        | 33.49    | 360.6    | 45.71035     |
| 0.4Cr  | 352230.5       | 601.96         | 33.93    | 145.42   | 34.74068     |

Table S3 The detailed analysis of decay curves for CAIC: 0.09Mn<sup>2+</sup>, yCr<sup>3+</sup>.CAIC: 0.09Mn<sup>2+</sup>, yCr<sup>3+</sup>, monitored at 1000 nm

| Sample/y           | 0.0100 | 0.0500 | 0.100 | 0.200 | 0.300 |
|--------------------|--------|--------|-------|-------|-------|
| $\tau/\mu\text{s}$ | 9.20   | 11.2   | 15.2  | 17.1  | 19.8  |

## References

1. A. K. Bedyal, V. Kumar, R. Prakash, O. M. Ntwaeaborwa and H. C. Swart, *Applied Surface Science*, 2015, **329**, 40-46.
2. A. Lever, *The Crystal Field Splitting Parameter  $Dq$ : Calculation and Significance*, Werner Centennial, **1967**.
